# Supplementary material for: The Gut Microbial Signature of Gestational Diabetes Mellitus and the Association With Diet Intervention
Source: PubMed Central journal article supplement (PMC8795975; doi:10.3389/fcimb.2021.800865), 2022-01-14

Fig S1

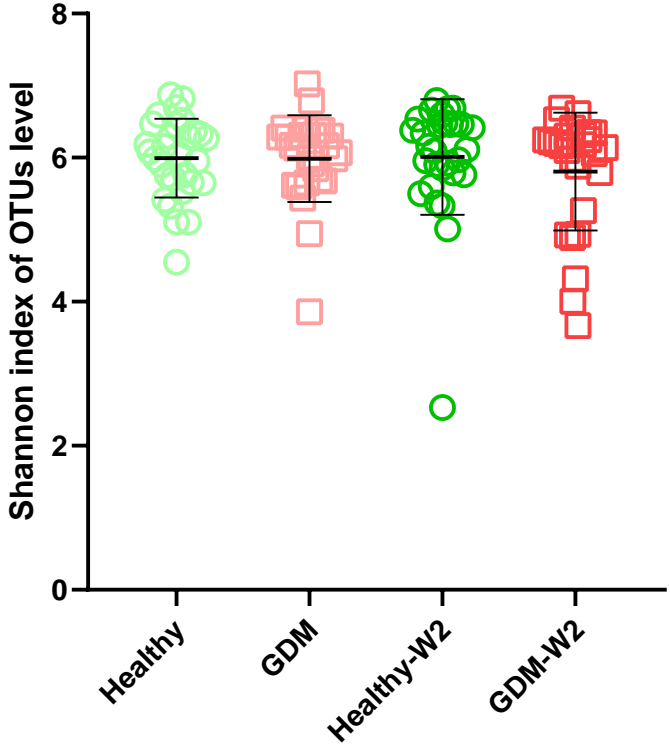

Fig S2

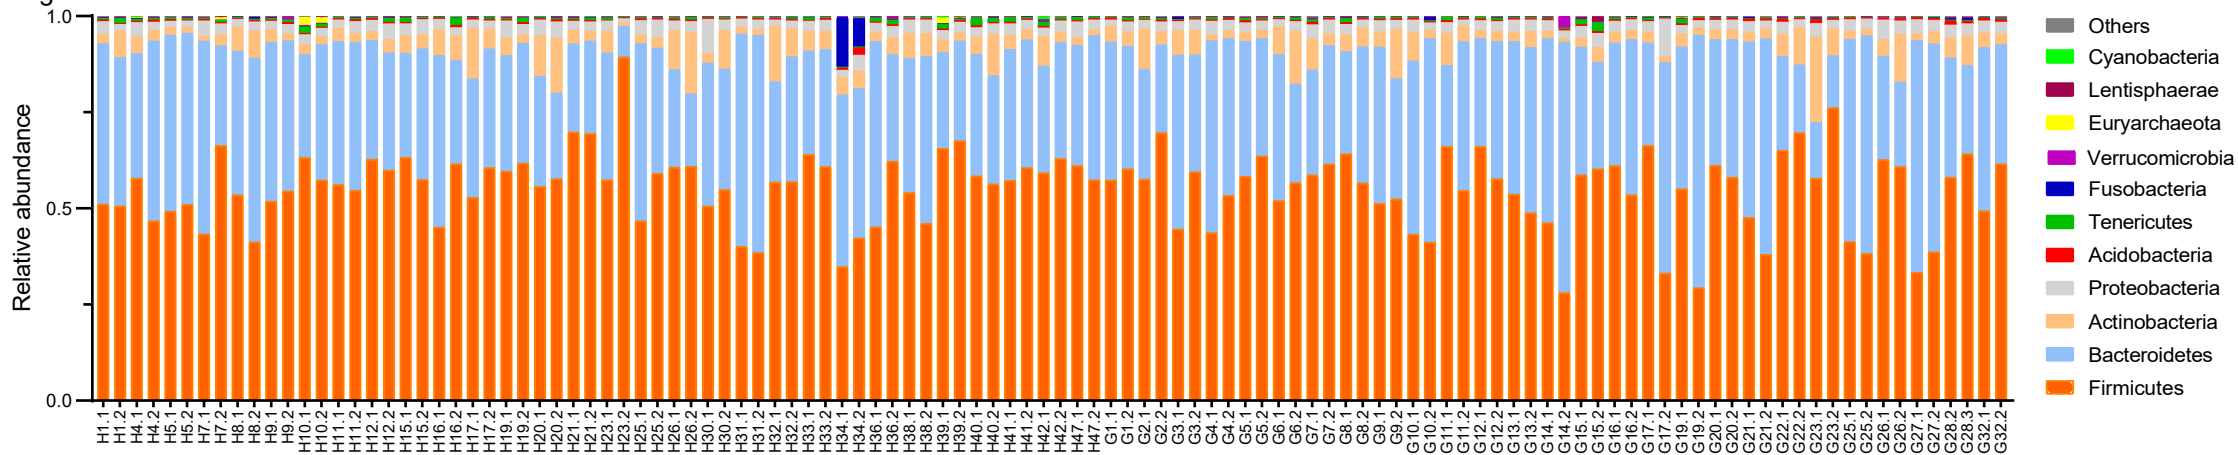

Fig S3

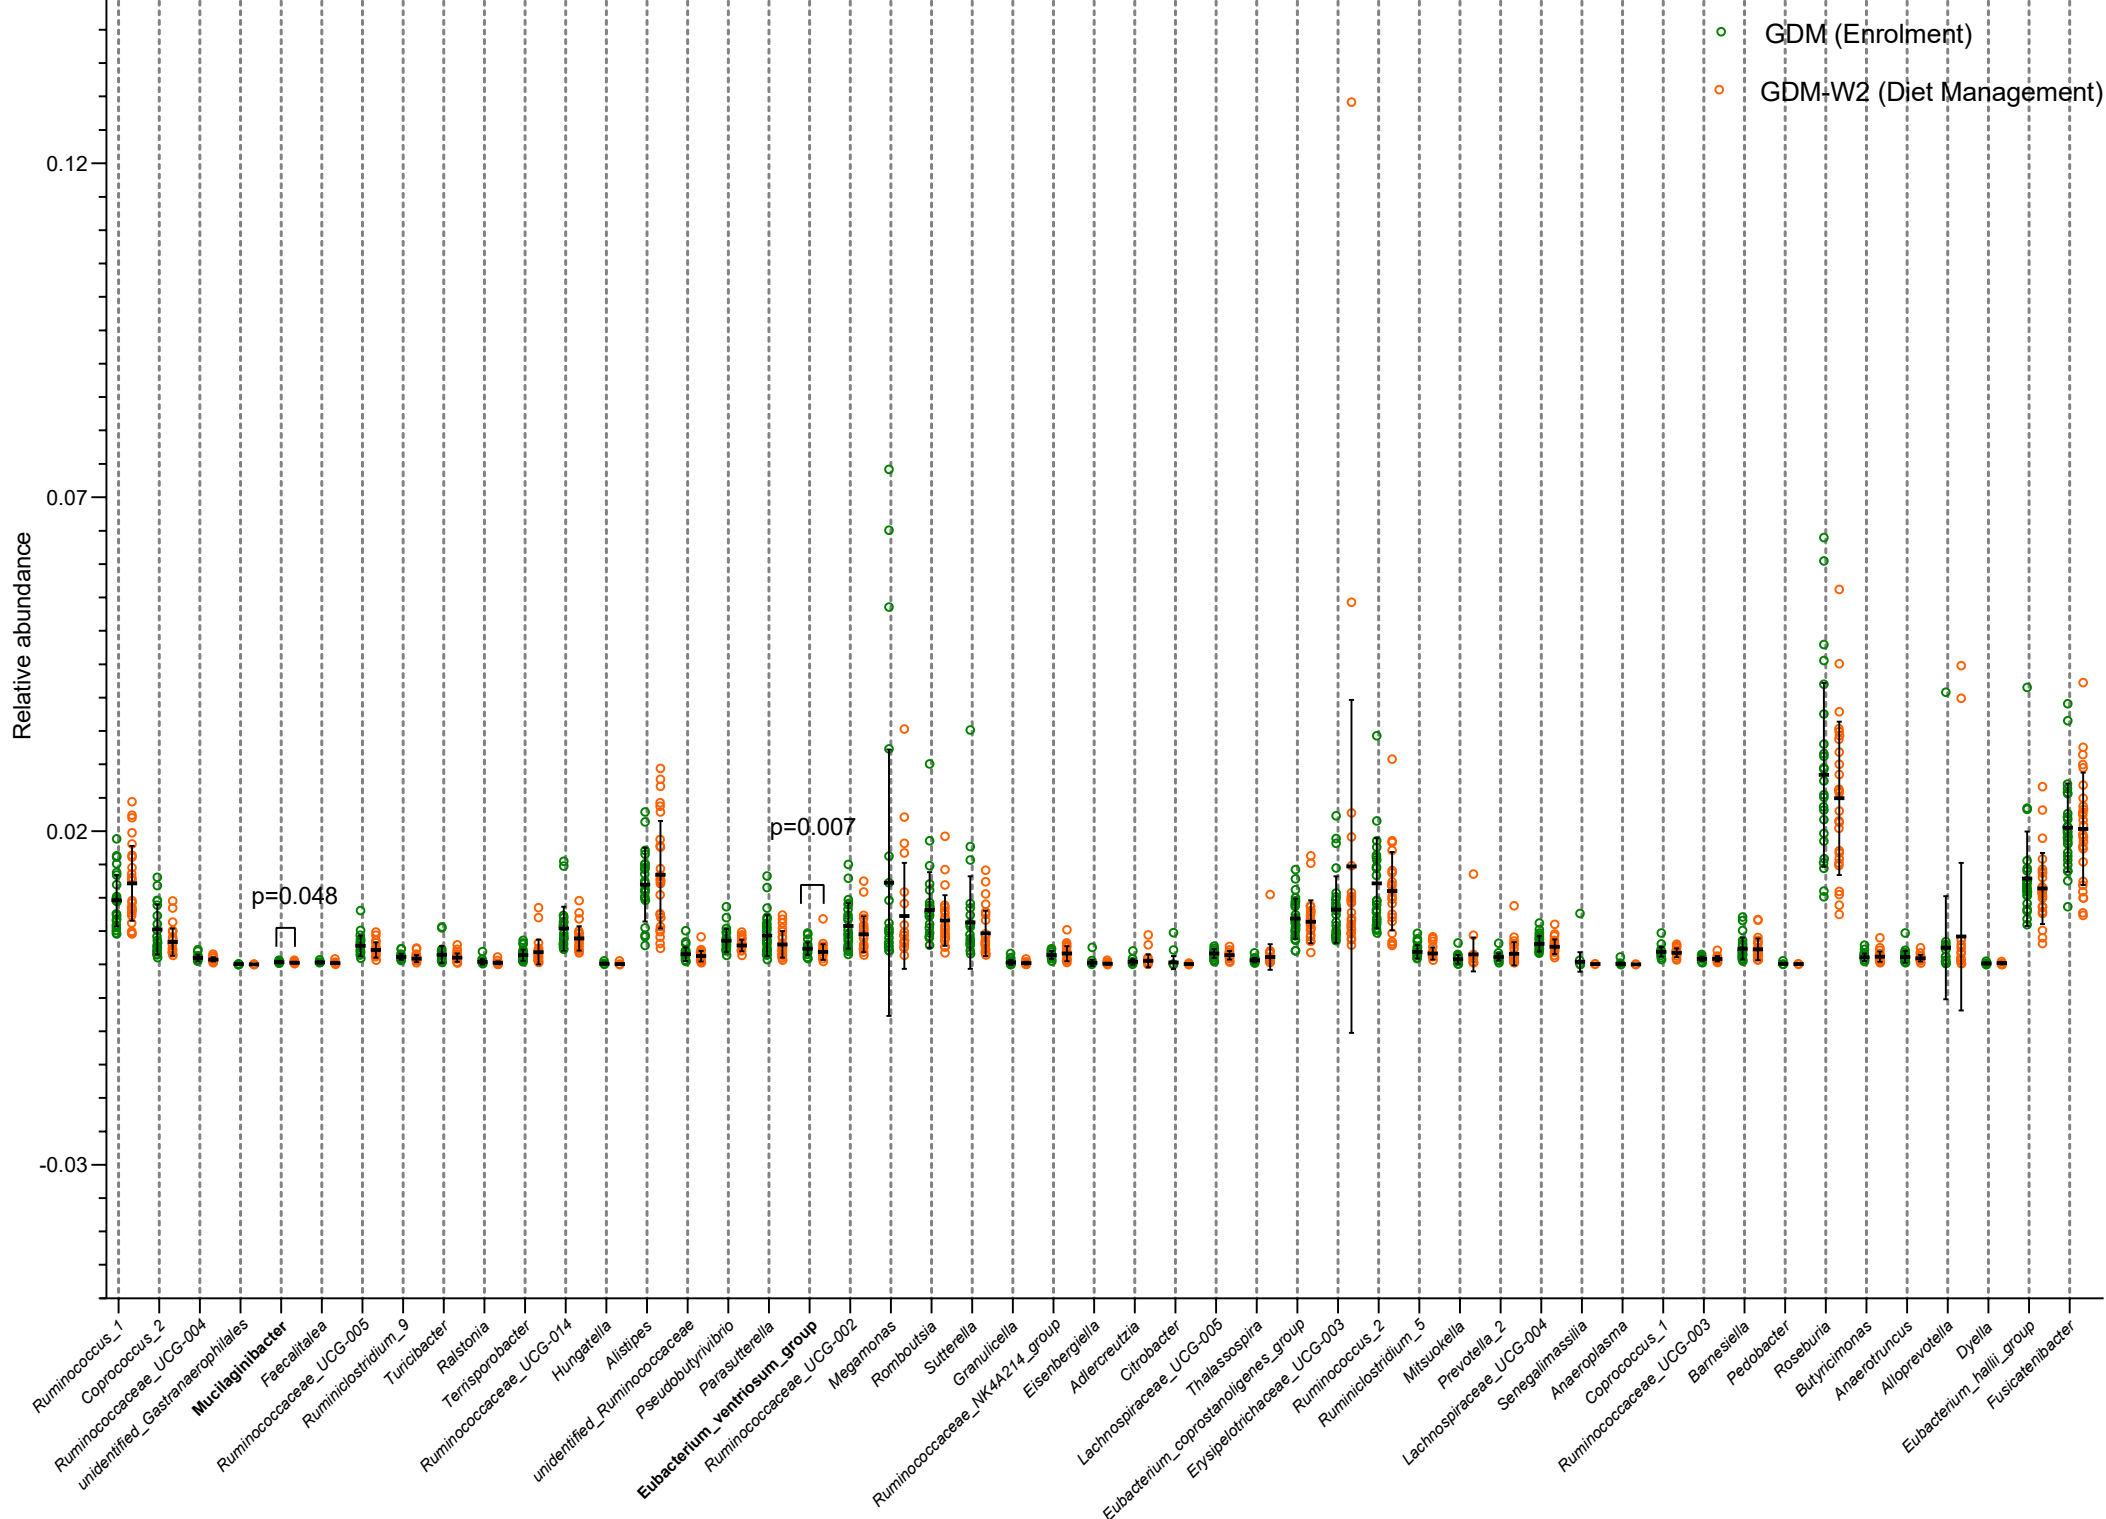

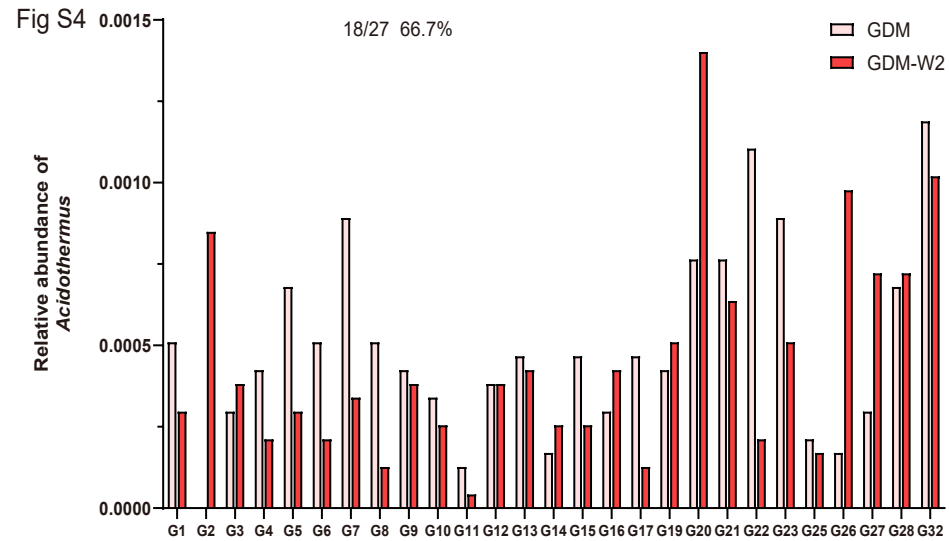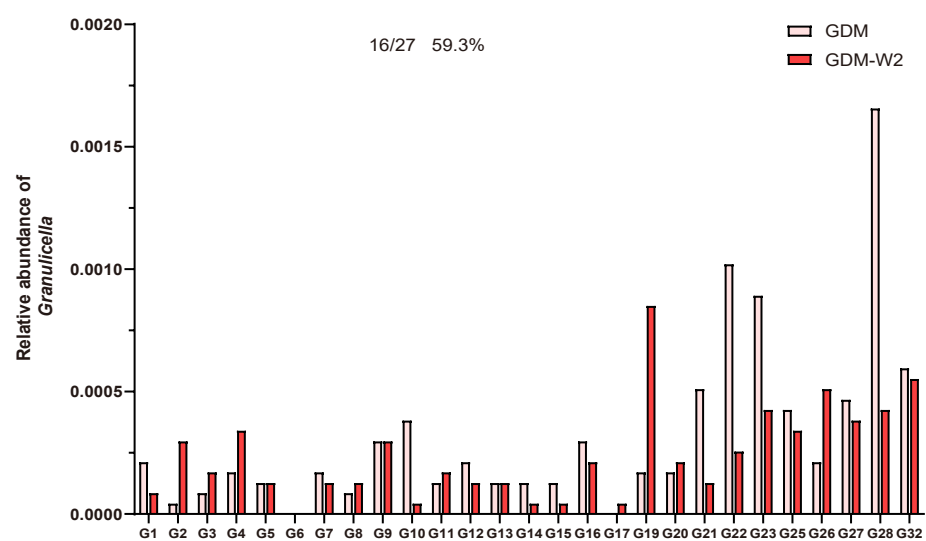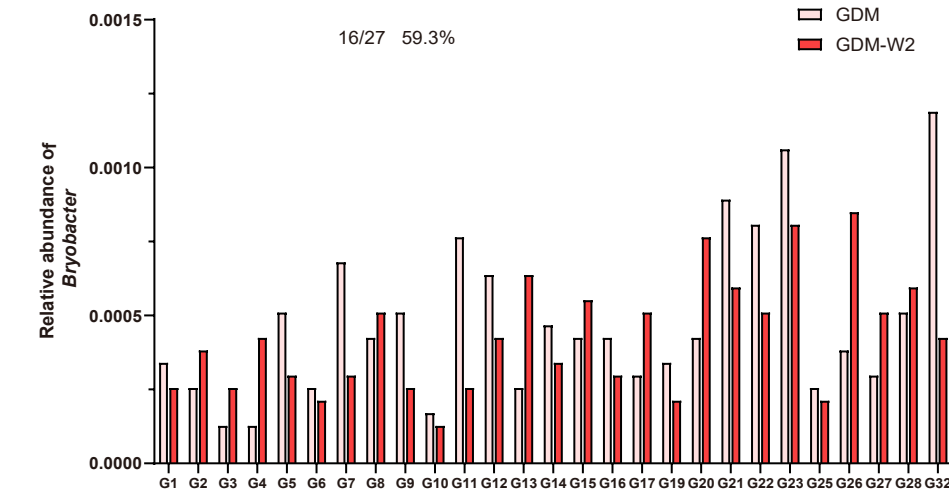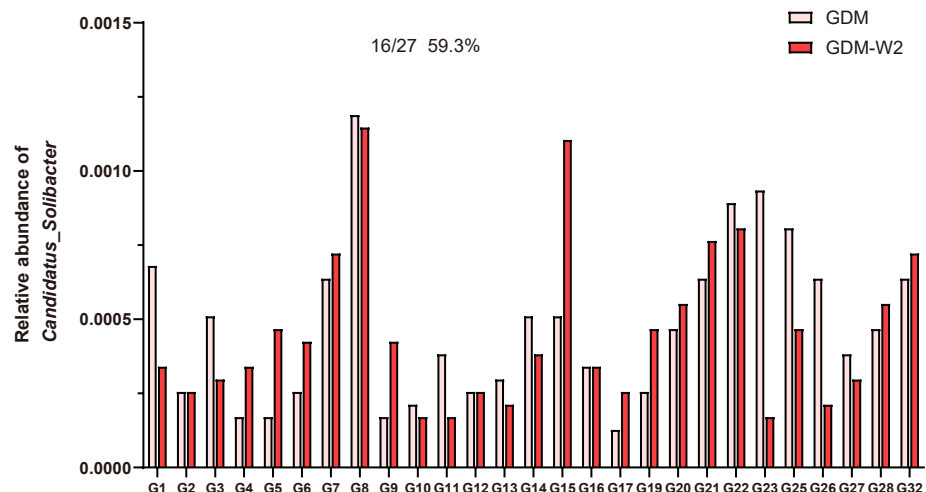

Fig S5

Healthy GDM

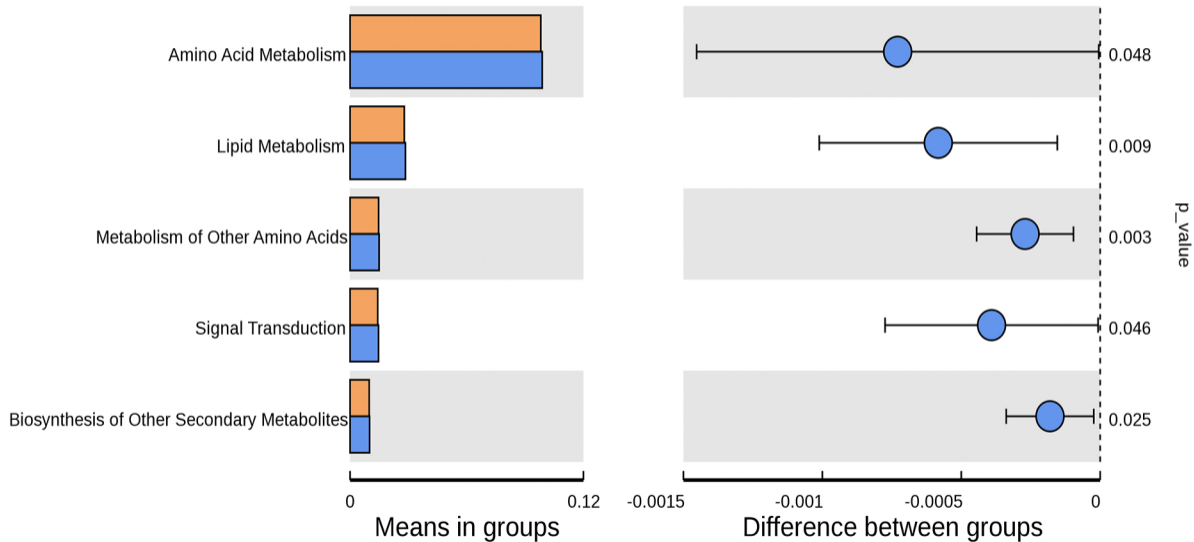

Supplement: Image_1.pdf [file Image_1.pdf]
